# Supplementary material for: Chitosan–Platelet-Rich Plasma Implants Improve Rotator Cuff Repair in a Large Animal Model: Pivotal Study
Source: MDPI journal article supplement (doi:10.3390/pharmaceutics13111955), 2021-11-18
Supplement: s1 [file s1]

# Supplementary Materials: Chitosan-Platelet-Rich Plasma Implants Improve Rotator Cuff Repair in a Large Animal Model: Pivotal Study

Anik Chevrier, Mark B. Hurtig and Marc Lavertu

**Table S1.** Continuous MRI measurements at 3 months (Chitosan-PRP versus controls).

|                       | Anchors<br>( <i>n</i> = 12) |      | Anchors + CS-PRP<br>( <i>n</i> = 24) |     | Anchors + CS-PRP vs<br>Anchors |                |
|-----------------------|-----------------------------|------|--------------------------------------|-----|--------------------------------|----------------|
| Reader 1              | Mean                        | SD   | Mean                                 | SD  | Effect size <sup>1</sup>       | p <sup>2</sup> |
| Tendon gap (mm)       | 44.3                        | 10.9 | 40.5                                 | 8.9 | −0.39                          | 0.371          |
| Tendon thickness (mm) | 15.5                        | 4.2  | 16.2                                 | 4.4 | 0.15                           | 0.485          |
| Tendon volume (cc)    | 13.1                        | 7.7  | 12.7                                 | 5.3 | −0.06                          | 0.727          |
| Reader 2              | Mean                        | SD   | Mean                                 | SD  | Effect size <sup>1</sup>       | p <sup>2</sup> |
| Tendon gap (mm)       | 48.3                        | 10.3 | 41.7                                 | 6.1 | −0.78                          | 0.019          |
| Tendon thickness (mm) | 13.5                        | 2.6  | 14.4                                 | 4.0 | 0.29                           | 0.777          |

<sup>1</sup> Cohen's *d* were calculated and interpreted as representing small (Cohen's *d* = 0.2), moderate (Cohen's *d* = 0.5) or large (Cohen's *d* = 0.8) differences between groups; <sup>2</sup> p-value from Wilcoxon test.

**Table S2.** Continuous MRI measurements at 6 months (Chitosan-PRP versus controls).

|                       | Anchors<br>( <i>n</i> = 12) |      | Anchors + CS-PRP<br>( <i>n</i> = 24) |      | Anchors + CS-PRP<br>vs Anchors |                |
|-----------------------|-----------------------------|------|--------------------------------------|------|--------------------------------|----------------|
| Reader 1              | Mean                        | SD   | Mean                                 | SD   | Effect size <sup>1</sup>       | p <sup>2</sup> |
| Tendon gap (mm)       | 31.6                        | 18.0 | 25.4                                 | 17.1 | −0.36                          | 0.275          |
| Tendon thickness (mm) | 15.3                        | 4.6  | 15.5                                 | 5.4  | 0.05                           | 0.881          |
| Tendon volume (cc)    | 9.2                         | 5.5  | 11.0                                 | 6.0  | 0.31                           | 0.281          |
| Reader 2              | Mean                        | SD   | Mean                                 | SD   | Effect size <sup>1</sup>       | p <sup>2</sup> |
| Tendon gap (mm)       | 24.6                        | 21.1 | 21.1                                 | 17.8 | −0.18                          | 0.562          |
| Tendon thickness (mm) | 12.1                        | 4.6  | 11.9                                 | 4.2  | −0.04                          | 0.665          |

<sup>1</sup> Cohen's *d* were calculated and interpreted as representing small (Cohen's *d* = 0.2), moderate (Cohen's *d* = 0.5) or large (Cohen's *d* = 0.8) differences between groups; <sup>2</sup> p-value from Wilcoxon test.

**Table S3.** Categorical MRI scores at 3 months (Chitosan-PRP versus controls).

|           | Anchors<br>( <i>n</i> = 12)       |   | Anchors + CS-PRP<br>( <i>n</i> = 24) |    | Anchors + CS-PRP vs<br>Anchors |                |
|-----------|-----------------------------------|---|--------------------------------------|----|--------------------------------|----------------|
| Parameter | <i>n</i>                          | % | <i>n</i>                             | %  | c-stat <sup>1</sup>            | p <sup>2</sup> |
| Reader 1  | <b>Presence of Bursitis</b>       |   |                                      |    | 0.505                          | 1.000          |
|           | None (0)                          | 5 | 41.7                                 | 9  |                                |                |
|           | Mild (1)                          | 6 | 50.0                                 | 15 |                                |                |
|           | Moderate (2)                      | 1 | 8.3                                  | 0  |                                |                |
|           | Severe (3)                        | 0 | 0.0                                  | 0  |                                |                |
|           | <b>Synovial Reaction</b>          |   |                                      |    | 0.542                          | 0.719          |
|           | None (0)                          | 2 | 16.7                                 | 4  |                                |                |
|           | Mild (1)                          | 6 | 50.0                                 | 10 |                                |                |
|           | Moderate (2)                      | 4 | 33.3                                 | 9  |                                |                |
|           | Severe (3)                        | 0 | 0.0                                  | 1  |                                |                |
|           | <b>Heterotopic Bone Formation</b> |   |                                      |    | c-stat <sup>1</sup>            | p <sup>2</sup> |
|           | <i>n</i>                          | % | <i>n</i>                             | %  |                                |                |

|          |                                   |          |      |          |      |                           |                      |
|----------|-----------------------------------|----------|------|----------|------|---------------------------|----------------------|
| Reader 2 | None (0)                          | 4        | 33.3 | 6        | 25.0 | 0.528                     | 0.781                |
|          | Mild (1)                          | 4        | 33.3 | 7        | 29.2 |                           |                      |
|          | Moderate (2)                      | 0        | 0.0  | 6        | 25.0 |                           |                      |
|          | Severe (3)                        | 4        | 33.3 | 5        | 20.8 |                           |                      |
|          | <b>Erosion Along the Anchors</b>  | <i>n</i> | %    | <i>n</i> | %    | <b>c-stat<sup>1</sup></b> | <b>p<sup>2</sup></b> |
|          | Sum = 0.0                         | 3        | 25.0 | 7        | 29.2 | 0.521                     | 0.829                |
|          | Sum = 0.5                         | 7        | 58.3 | 9        | 37.5 |                           |                      |
|          | Sum = 1.0                         | 0        | 0.0  | 7        | 29.2 |                           |                      |
|          | Sum = 1.5                         | 0        | 0.0  | 0        | 0.0  |                           |                      |
|          | Sum = 2.0                         | 2        | 16.7 | 1        | 4.2  |                           |                      |
|          | Sum = 2.5                         | 0        | 0.0  | 0        | 0.0  |                           |                      |
|          | Sum = 3.0                         | 0        | 0.0  | 0        | 0.0  |                           |                      |
|          | Sum = 3.5                         | 0        | 0.0  | 0        | 0.0  |                           |                      |
|          | Sum = 4.0                         | 0        | 0.0  | 0        | 0.0  |                           |                      |
|          | <b>Presence of Bursitis</b>       | <i>n</i> | %    | <i>n</i> | %    | <b>c-stat<sup>1</sup></b> | <b>p<sup>2</sup></b> |
|          | None (0)                          | 6        | 50.0 | 10       | 41.7 | 0.542                     | 0.729                |
|          | Mild (1)                          | 6        | 50.0 | 14       | 58.3 |                           |                      |
|          | Moderate (2)                      | 0        | 0.0  | 0        | 0.0  |                           |                      |
|          | Severe (3)                        | 0        | 0.0  | 0        | 0.0  |                           |                      |
|          | <b>Synovial Reaction</b>          | <i>n</i> | %    | <i>n</i> | %    | <b>c-stat<sup>1</sup></b> | <b>p<sup>2</sup></b> |
|          | None (0)                          | 2        | 16.7 | 3        | 12.5 | 0.608                     | 0.321                |
|          | Mild (1)                          | 10       | 83.3 | 16       | 66.7 |                           |                      |
|          | Moderate (2)                      | 0        | 0.0  | 5        | 20.8 |                           |                      |
|          | Severe (3)                        | 0        | 0.0  | 0        | 0.0  |                           |                      |
|          | <b>Heterotopic Bone Formation</b> | <i>n</i> | %    | <i>n</i> | %    | <b>c-stat<sup>1</sup></b> | <b>p<sup>2</sup></b> |
|          | None (0)                          | 6        | 50.0 | 7        | 29.2 | 0.608                     | 0.287                |
|          | Mild (1)                          | 3        | 25.0 | 6        | 25.0 |                           |                      |
|          | Moderate (2)                      | 1        | 8.3  | 8        | 33.3 |                           |                      |
|          | Severe (3)                        | 2        | 16.7 | 3        | 12.5 |                           |                      |
|          | <b>Erosion Along the Anchors</b>  | <i>n</i> | %    | <i>n</i> | %    | <b>c-stat<sup>1</sup></b> | <b>p<sup>2</sup></b> |
|          | Sum = 0.0                         | 5        | 41.7 | 14       | 58.3 | 0.587                     | 0.408                |
|          | Sum = 0.5                         | 4        | 33.3 | 6        | 25.0 |                           |                      |
|          | Sum = 1.0                         | 3        | 25.0 | 4        | 16.7 |                           |                      |
|          | Sum = 1.5                         | 0        | 0.0  | 0        | 0.0  |                           |                      |
|          | Sum = 2.0                         | 0        | 0.0  | 0        | 0.0  |                           |                      |
|          | Sum = 2.5                         | 0        | 0.0  | 0        | 0.0  |                           |                      |
|          | Sum = 3.0                         | 0        | 0.0  | 0        | 0.0  |                           |                      |
|          | Sum = 3.5                         | 0        | 0.0  | 0        | 0.0  |                           |                      |
|          | Sum = 4.0                         | 0        | 0.0  | 0        | 0.0  |                           |                      |

<sup>1</sup> c-statistic or Area Under the Receiver Operating Characteristic Curve (AUC). c-statistics from 0.6 – 0.7 were considered moderate evidence of an association, and c-statistics > 0.7 were considered strong evidence of a relationship; <sup>2</sup> p-value from Exact Wilcoxon test.

**Table S4.** Categorical MRI scores at 6 months (Chitosan-PRP versus controls).

|          | Parameter            | Anchors<br>( <i>n</i> = 12) |      | Anchors + CS-PRP<br>( <i>n</i> = 24) |      | Anchors + CS-PRP vs<br>Anchors |                |
|----------|----------------------|-----------------------------|------|--------------------------------------|------|--------------------------------|----------------|
|          | Presence of Bursitis | <i>n</i>                    | %    | <i>n</i>                             | %    | c-stat <sup>1</sup>            | p <sup>2</sup> |
| Reader 1 | None (0)             | 5                           | 41.7 | 10                                   | 41.7 | 0.500                          | 1.000          |
|          | Mild (1)             | 6                           | 50.0 | 12                                   | 50.0 |                                |                |
|          | Moderate (2)         | 1                           | 8.3  | 2                                    | 8.3  |                                |                |

|          |                                   |          |      |          |      |       |       |
|----------|-----------------------------------|----------|------|----------|------|-------|-------|
| Reader 2 | Severe (3)                        | 0        | 0.0  | 0        | 0.0  | 0.599 | 0.323 |
|          | <b>Synovial Reaction</b>          | <i>n</i> | %    | <i>n</i> | %    |       |       |
|          | None (0)                          | 4        | 33.3 | 2        | 8.3  |       |       |
|          | Mild (1)                          | 5        | 41.7 | 16       | 66.7 |       |       |
|          | Moderate (2)                      | 3        | 25.0 | 5        | 20.8 |       |       |
|          | Severe (3)                        | 0        | 0.0  | 1        | 4.2  | 0.510 | 0.957 |
|          | <b>Heterotopic Bone Formation</b> | <i>n</i> | %    | <i>n</i> | %    |       |       |
|          | None (0)                          | 4        | 33.3 | 2        | 8.3  |       |       |
|          | Mild (1)                          | 2        | 16.7 | 8        | 33.3 |       |       |
|          | Moderate (2)                      | 1        | 8.3  | 10       | 41.7 |       |       |
|          | Severe (3)                        | 5        | 41.7 | 4        | 16.7 | 0.556 | 0.579 |
|          | <b>Erosion Along the Anchors</b>  | <i>n</i> | %    | <i>n</i> | %    |       |       |
|          | Sum = 0.0                         | 1        | 8.3  | 5        | 20.8 |       |       |
|          | Sum = 0.5                         | 9        | 75.0 | 9        | 37.5 |       |       |
|          | Sum = 1.0                         | 1        | 98.3 | 7        | 29.2 |       |       |
|          | Sum = 1.5                         | 0        | 0.0  | 0        | 0.0  |       |       |
|          | Sum = 2.0                         | 1        | 8.3  | 3        | 12.5 |       |       |
|          | Sum = 2.5                         | 0        | 0.0  | 0        | 0.0  |       |       |
|          | Sum = 3.0                         | 0        | 0.0  | 0        | 0.0  |       |       |
|          | Sum = 3.5                         | 0        | 0.0  | 0        | 0.0  |       |       |
|          | Sum = 4.0                         | 0        | 0.0  | 0        | 0.0  | 0.559 | 0.633 |
|          | <b>Presence of Bursitis</b>       | <i>n</i> | %    | <i>n</i> | %    |       |       |
|          | None (0)                          | 5        | 41.7 | 14       | 58.3 |       |       |
|          | Mild (1)                          | 7        | 58.3 | 8        | 33.3 |       |       |
|          | Moderate (2)                      | 0        | 0.0  | 2        | 8.3  |       |       |
|          | Severe (3)                        | 0        | 0.0  | 0        | 0.0  | 0.585 | 0.348 |
|          | <b>Synovial reaction</b>          | <i>n</i> | %    | <i>n</i> | %    |       |       |
|          | None (0)                          | 1        | 8.3  | 7        | 29.2 |       |       |
|          | Mild (1)                          | 11       | 91.7 | 16       | 66.7 |       |       |
|          | Moderate (2)                      | 0        | 0.0  | 1        | 4.2  |       |       |
|          | Severe (3)                        | 0        | 0.0  | 0        | 0.0  | 0.589 | 0.372 |
|          | <b>Heterotopic Bone Formation</b> | <i>n</i> | %    | <i>n</i> | %    |       |       |
|          | None (0)                          | 6        | 50.0 | 4        | 16.7 |       |       |
|          | Mild (1)                          | 1        | 8.3  | 12       | 50.0 |       |       |
|          | Moderate (2)                      | 4        | 33.3 | 5        | 20.8 |       |       |
|          | Severe (3)                        | 1        | 8.3  | 3        | 12.5 | 0.672 | 0.023 |
|          | <b>Erosion Along the Anchors</b>  | <i>n</i> | %    | <i>n</i> | %    |       |       |
|          | Sum = 0.0                         | 3        | 25.0 | 0        | 0.0  |       |       |
|          | Sum = 0.5                         | 9        | 75.0 | 21       | 87.5 |       |       |
|          | Sum = 1.0                         | 0        | 0.0  | 3        | 12.5 |       |       |
|          | Sum = 1.5                         | 0        | 0.0  | 0        | 0.0  |       |       |
|          | Sum = 2.0                         | 0        | 0.0  | 0        | 0.0  |       |       |
|          | Sum = 2.5                         | 0        | 0.0  | 0        | 0.0  |       |       |
|          | Sum = 3.0                         | 0        | 0.0  | 0        | 0.0  |       |       |
|          | Sum = 3.5                         | 0        | 0.0  | 0        | 0.0  |       |       |
|          | Sum = 4.0                         | 0        | 0.0  | 0        | 0.0  |       |       |

<sup>1</sup> c-statistic or Area Under the Receiver Operating Characteristic Curve (AUC). c-statistics from 0.6 – 0.7 were considered moderate evidence of an association, and c-statistics > 0.7 were considered strong evidence of a relationship; <sup>2</sup> p-value from Exact Wilcoxon test.

**Table S5.** Histological scores of tendon tissues (Chitosan-PRP versus controls).

| Parameter                                                                                          | Anchors<br>( <i>n</i> = 12) |      | Anchors + CS-PRP<br>( <i>n</i> = 24) |       | Anchors + CS-PRP<br>vs Anchors |                |
|----------------------------------------------------------------------------------------------------|-----------------------------|------|--------------------------------------|-------|--------------------------------|----------------|
| Cellularity                                                                                        | <i>n</i>                    | %    | <i>n</i>                             | %     | c-stat <sup>1</sup>            | p <sup>2</sup> |
| None (0)                                                                                           | 0                           | 0.0  | 0                                    | 0.0   | 0.625                          | 0.031          |
| Minimal (1)                                                                                        | 0                           | 0.0  | 0                                    | 0.0   |                                |                |
| Mild (2) <sup>1</sup>                                                                              | 9                           | 75.0 | 24                                   | 100.0 |                                |                |
| Moderate (3)                                                                                       | 3                           | 25.0 | 0                                    | 0.0   |                                |                |
| Marked (4)                                                                                         | 0                           | 0.0  | 0                                    | 0.0   |                                |                |
| Tenocytes                                                                                          | <i>n</i>                    | %    | <i>n</i>                             | %     | c-stat <sup>1</sup>            | p <sup>2</sup> |
| Marked/Normal (0)                                                                                  | 2                           | 16.7 | 7                                    | 29.2  | 0.563                          | 0.685          |
| Moderate (1)                                                                                       | 10                          | 83.3 | 17                                   | 70.8  |                                |                |
| Mild (2)                                                                                           | 0                           | 0.0  | 0                                    | 0.0   |                                |                |
| Minimal (3)                                                                                        | 0                           | 0.0  | 0                                    | 0.0   |                                |                |
| None (4)                                                                                           | 0                           | 0.0  | 0                                    | 0.0   |                                |                |
| Inflammatory Cells in<br>Tendon Tissue                                                             | <i>n</i>                    | %    | <i>n</i>                             | %     | c-stat <sup>1</sup>            | p <sup>2</sup> |
| None (0)                                                                                           | 7                           | 58.3 | 24                                   | 100.0 | 0.708                          | 0.002          |
| Minimal (1)                                                                                        | 2                           | 16.7 | 0                                    | 0.0   |                                |                |
| Mild (2)                                                                                           | 1                           | 8.3  | 0                                    | 0.0   |                                |                |
| Moderate (3)                                                                                       | 2                           | 16.7 | 0                                    | 0.0   |                                |                |
| Marked (4)                                                                                         | 0                           | 0.0  | 0                                    | 0.0   |                                |                |
| Vascularity                                                                                        | <i>n</i>                    | %    | <i>n</i>                             | %     | c-stat <sup>1</sup>            | p <sup>2</sup> |
| None (0)                                                                                           | 0                           | 0.0  | 0                                    | 0.0   | 0.521                          | 1.000          |
| Minimal (1)                                                                                        | 9                           | 75.0 | 17                                   | 70.8  |                                |                |
| Mild (2)                                                                                           | 3                           | 25.0 | 7                                    | 29.2  |                                |                |
| Moderate (3)                                                                                       | 0                           | 0.0  | 0                                    | 0.0   |                                |                |
| Marked (4)                                                                                         | 0                           | 0.0  | 0                                    | 0.0   |                                |                |
| Structural Organization                                                                            | <i>n</i>                    | %    | <i>n</i>                             | %     | c-stat <sup>1</sup>            | p <sup>2</sup> |
| Native tendon (0)                                                                                  | 0                           | 0.0  | 0                                    | 0.0   | 0.521                          | 1.000          |
| Repair tissue mostly<br>organized in bundles (1)                                                   | 2                           | 16.7 | 5                                    | 20.8  |                                |                |
| Repair tissue mostly aligned<br>but not in bundles (2)                                             | 10                          | 83.3 | 19                                   | 79.2  |                                |                |
| Repair tissue completely<br>disorganized, but areas of<br>tendon material can be<br>identified (3) | 0                           | 0.0  | 0                                    | 0.0   |                                |                |
| Complete loss of tendon<br>architecture (minimal or no<br>recognizable tendon<br>material) (4)     | 0                           | 0.0  | 0                                    | 0.0   |                                |                |
| Glycosaminoglycan<br>Expression                                                                    | <i>n</i>                    | %    | <i>n</i>                             | %     | c-stat <sup>1</sup>            | p <sup>2</sup> |
| None (0)                                                                                           | 0                           | 0.0  | 0                                    | 0.0   | 0.509                          | 0.954          |
| Minimal (1)                                                                                        | 2                           | 16.7 | 0                                    | 0.0   |                                |                |
| Mild (2)                                                                                           | 1                           | 8.3  | 8                                    | 33.3  |                                |                |
| Moderate (3)                                                                                       | 7                           | 58.3 | 11                                   | 45.8  |                                |                |
| Marked (4)                                                                                         | 2                           | 16.7 | 5                                    | 20.8  |                                |                |

<sup>1</sup> c-statistic or Area Under the Receiver Operating Characteristic Curve (AUC). c-statistics from 0.6 – 0.7 were considered moderate evidence of an association, and c-statistics > 0.7 were considered strong evidence of a relationship; <sup>2</sup> p-value from Exact Wilcoxon test.

**Table S6.** Histological scores of enthesis tissues (Chitosan-PRP versus controls).

| Parameter                                                                                                  | Anchors<br>( <i>n</i> = 12) |      | Anchors + CS-PRP<br>( <i>n</i> = 24) |      | Anchors + CS-PRP<br>vs Anchors |                |
|------------------------------------------------------------------------------------------------------------|-----------------------------|------|--------------------------------------|------|--------------------------------|----------------|
| Structural Appearance of<br>the Enthesis                                                                   | <i>n</i>                    | %    | <i>n</i>                             | %    | c-stat <sup>1</sup>            | p <sup>2</sup> |
| Native insertion with<br>tidemark throughout (0)                                                           | 0                           | 0.0  | 0                                    | 0.0  | 0.521                          | 1.000          |
| Insertion has continuity<br>with bone ingrowth and<br>fibrocartilage and tidemark<br>partially present (1) | 10                          | 83.3 | 19                                   | 79.2 |                                |                |
| Insertion has continuity<br>with bone ingrowth and<br>fibrocartilage cells but no<br>tidemark (2)          | 2                           | 16.7 | 5                                    | 20.8 |                                |                |
| Insertion has continuity<br>with fibrous tissue (3)                                                        | 0                           | 0.0  | 0                                    | 0.0  |                                |                |
| Insertion has continuity<br>with fat (4)                                                                   | 0                           | 0.0  | 0                                    | 0.0  |                                |                |
| No continuity (5)                                                                                          | 0                           | 0.0  | 0                                    | 0.0  |                                |                |
| Glycosaminoglycans<br>(GAG) at Insertion Site                                                              | <i>n</i>                    | %    | <i>n</i>                             | %    | c-stat <sup>1</sup>            | p <sup>2</sup> |
| No change/typical<br>appearance and/or<br>subjective quantity of GAG<br>staining (0)                       | 2                           | 16.7 | 13                                   | 54.2 | 0.688                          | 0.071          |
| Slight (some GAG staining<br>but faint), decreased<br>compared to typical<br>insertion site (1)            | 10                          | 83.3 | 11                                   | 45.8 |                                |                |
| None (complete absence of<br>GAG staining) (2)                                                             | 0                           | 0.0  | 0                                    | 0.0  |                                |                |
| Bone Remodeling at<br>Insertion Site                                                                       | <i>n</i>                    | %    | <i>n</i>                             | %    | c-stat <sup>1</sup>            | p <sup>2</sup> |
| None (0)                                                                                                   | 0                           | 0.0  | 0                                    | 0.0  | 0.561                          | 0.583          |
| Minimal (1)                                                                                                | 0                           | 0.0  | 1                                    | 4.2  |                                |                |
| Mild (2)                                                                                                   | 1                           | 8.3  | 6                                    | 25.0 |                                |                |
| Moderate (3)                                                                                               | 8                           | 66.7 | 10                                   | 41.7 |                                |                |
| Marked (4)                                                                                                 | 3                           | 25.0 | 7                                    | 29.2 |                                |                |

<sup>1</sup> c-statistic or Area Under the Receiver Operating Characteristic Curve (AUC). c-statistics from 0.6 – 0.7 were considered moderate evidence of an association, and c-statistics > 0.7 were considered strong evidence of a relationship; <sup>2</sup> p-value from Exact Wilcoxon test.

**Table S7.** Histological scores of pan-enthesis site (Chitosan-PRP versus controls).

| Parameter                               | Anchors<br>( <i>n</i> = 12) |     | Anchors + CS-PRP<br>( <i>n</i> = 24) |     | Anchors + CS-PRP<br>vs Anchors |                |
|-----------------------------------------|-----------------------------|-----|--------------------------------------|-----|--------------------------------|----------------|
| Pan-enthesis<br>Remodeling/Healing      | <i>n</i>                    | %   | <i>n</i>                             | %   | c-stat <sup>1</sup>            | p <sup>2</sup> |
| No healing of enthesis site (0)         | 0                           | 0.0 | 0                                    | 0.0 | 0.726                          | 0.019          |
| Partial healing of enthesis<br>site (1) | 1                           | 8.3 | 0                                    | 0.0 |                                |                |

|                                                                                                                                                          |          |       |          |      |                           |                      |
|----------------------------------------------------------------------------------------------------------------------------------------------------------|----------|-------|----------|------|---------------------------|----------------------|
| Complete healing of enthesis site with moderate remodeling (2)                                                                                           | 8        | 66.7  | 10       | 41.7 |                           |                      |
| Complete healing of enthesis site with mild remodeling (3)                                                                                               | 3        | 25.0  | 6        | 25.0 |                           |                      |
| Complete healing of enthesis site with a smaller degree of remodeling (4)                                                                                | 0        | 0.0   | 8        | 33.3 |                           |                      |
| Complete healing of enthesis site with well-organized repair tissue; appears very similar/identical to native enthesis; recapitulates native anatomy (5) | 0        | 0.0   | 0        | 0.0  |                           |                      |
| <b>Length of Insertion site Present</b>                                                                                                                  | <i>n</i> | %     | <i>n</i> | %    | <b>c-stat<sup>1</sup></b> | <b>p<sup>2</sup></b> |
| No insertion site evidence on slide (0)                                                                                                                  | 0        | 0.0   | 0        | 0.0  | 0.521                     | 1.000                |
| Approximately <25% length of tissue on slide (1)                                                                                                         | 0        | 0.0   | 0        | 0.0  |                           |                      |
| Approximately 26-50% length of tissue on slide (2)                                                                                                       | 0        | 0.0   | 0        | 0.0  |                           |                      |
| Approximately 51-75% length of tissue on slide (3)                                                                                                       | 0        | 0.0   | 1        | 4.2  |                           |                      |
| Approximately >76% length of tissue on slide (4)                                                                                                         | 12       | 100.0 | 23       | 95.8 |                           |                      |
| <b>Quality/Consistency of Glycosaminoglycan (GAG) Staining of Cartilage/Fibrocartilage</b>                                                               | <i>n</i> | %     | <i>n</i> | %    | <b>c-stat<sup>1</sup></b> | <b>p<sup>2</sup></b> |
| Absence of GAG staining (no red color with Safranin-O) (0)                                                                                               | 0        | 0.0   | 0        | 0.0  | 0.604                     | 0.190                |
| Minimal GAG staining (decreased staining intensity) (1)                                                                                                  | 0        | 0.0   | 0        | 0.0  |                           |                      |
| Mild level of GAG staining (slightly decreased staining intensity) (2)                                                                                   | 4        | 33.3  | 3        | 12.5 |                           |                      |
| Typical level of GAG staining +/- minimal staining of fibrous bundles associated with fibrocartilage (3)                                                 | 8        | 66.7  | 21       | 87.5 |                           |                      |
| Excessive widespread GAG staining (4)                                                                                                                    | 0        | 0.0   | 0        | 0.0  |                           |                      |

<sup>1</sup> c-statistic or Area Under the Receiver Operating Characteristic Curve (AUC). c-statistics from 0.6 – 0.7 were considered moderate evidence of an association, and c-statistics > 0.7 were considered strong evidence of a relationship; <sup>2</sup> p-value from Exact Wilcoxon test.
